# Supplementary material for: Ideal chest compression site for cardiopulmonary resuscitation in fontan circulation patients with dextrocardia
Source: Springer Nature journal article supplement (doi:10.1186/s12872-023-03691-0), 2024-01-03

**Figure S1.** An assist device for transferring force to the right of conventional compression location  
location

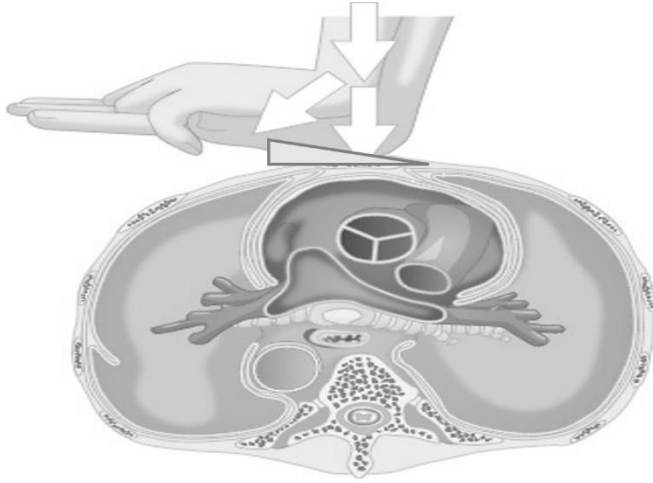

Supplement: MOESM1 [file 26588842]
